# Supplementary material
Source: publisher figshare collection journal article supplement (https://tandf.figshare.com/articles/dataset/_/18972752)
Supplement: Supplementary file 1 [file 1]

**Table S1.** MS/MS parameters for the analysis of target analytes in the MRM ESI<sup>+</sup> mode and validation data

| Number | Pesticide          | Type of pesticide | Chemical group  | T <sub>R</sub> (time) | Precursor ion, m/z | Quantitative ion, m/z ( <sup>b</sup> CE, eV) | Qualitative ion, m/z (CE, eV) | LOQ (mg/kg) | Recovery   |           | Repeatability (%RSD, n=5) |           | Within-laboratory reproducibility (%RSD, n=10) |           | U(%) |
|--------|--------------------|-------------------|-----------------|-----------------------|--------------------|----------------------------------------------|-------------------------------|-------------|------------|-----------|---------------------------|-----------|------------------------------------------------|-----------|------|
|        |                    |                   |                 |                       |                    |                                              |                               |             | 0.01 mg/kg | 0.2 mg/kg | 0.01 mg/kg                | 0.2 mg/kg | 0.01 mg/kg                                     | 0.2 mg/kg |      |
| 1      | Acephate           | IN                | organophosphate | 1.9                   | 184.1              | 143.0 (5)                                    | 95.0 (20)                     | 0.003       | 94.3       | 90.8      | 4.2                       | 8.7       | 8.4                                            | 3.9       | 29   |
| 2      | Acetamiprid        | IN                | neonicotinoid   | 4.1                   | 223.0              | 79.0 (30)                                    | 109.0 (20)                    | 0.002       | 94.6       | 88.1      | 7.4                       | 4.3       | 5.3                                            | 9.4       | 17   |
| 3      | Acetochlor         | HB                | amide           | 12.8                  | 270.2              | 224.0 (5)                                    | 148.2 (20)                    | 0.003       | 81.7       | 88.4      | 7.5                       | 6.1       | 6.3                                            | 6.2       | 18   |
| 4      | Aldicarb           | NE/IN/AC          | carbamate       | 4.8                   | 208.2              | 89.1 (20)                                    | 116.1 (10)                    | 0.007       | 94.6       | 91.7      | 8.6                       | 4.5       | 5.9                                            | 6.2       | 21   |
| 5      | Aldicarb sulfone   | NE/IN/AC          | carbamate       | 2.7                   | 223.0              | 86.0 (15)                                    | 148.0 (10)                    | 0.002       | 91.4       | 97.6      | 4.2                       | 1.6       | 6.6                                            | 12.7      | 32   |
| 6      | Aldicarb sulfoxide | NE/IN/AC          | carbamate       | 2.3                   | 207.0              | 89.0 (15)                                    | 132.0 (10)                    | 0.001       | 106.4      | 88.4      | 10.1                      | 4.7       | 4.7                                            | 8.5       | 19   |
| 7      | Atrazine           | HB                | triazine        | 6.5                   | 216.1              | 96.0 (25)                                    | 174.1 (20)                    | 0.001       | 94.6       | 97.2      | 4.7                       | 2.9       | 6.4                                            | 9.3       | 26   |
| 8      | Aziprotryne        | HB                | triazine        | 9.8                   | 226.1              | 156.1 (10)                                   | 198.1 (10)                    | 0.001       | 85.4       | 79.5      | 5.4                       | 7.4       | 2.9                                            | 3.9       | 16   |
| 9      | Azoxystrobin       | FU                | strobilurin     | 11.3                  | 404.0              | 329.0 (40)                                   | 372.0 (25)                    | 0.001       | 79.3       | 80.1      | 7.9                       | 9.1       | 5.2                                            | 5.3       | 31   |
| 10     | Benalaxyl          | FU                | unclassified    | 14.2                  | 326.2              | 148.1 (5)                                    | 294.0 (5)                     | 0.001       | 88.3       | 84.6      | 5.6                       | 8.4       | 9.3                                            | 7.8       | 39   |
| 11     | Bifenazate         | IN/AC             | hydrazine       | 12.4                  | 301.2              | 198.1 (5)                                    | 170.1 (20)                    | 0.008       | 98.5       | 92.8      | 3.6                       | 11.5      | 7.3                                            | 4.2       | 30   |
| 12     | Bioallethrin       | IN                | pyrethroid      | 17.7                  | 303.1              | 135.1 (10)                                   | 107.0 (20)                    | 0.050       | 86.4       | 81.7      | 8.9                       | 11.4      | 2.7                                            | 7.9       | 15   |
| 13     | Bioresmethrin      | IN                | pyrethroid      | 19.2                  | 339.2              | 171.1 (15)                                   | 143.1 (25)                    | 0.003       | 77.4       | 71.6      | 8.4                       | 11.4      | 6.3                                            | 4.6       | 27   |
| 14     | Bitertanol         | FU                | triazole        | 12.9                  | 338.2              | 70.0 (5)                                     | 269.2 (5)                     | 0.008       | 90.1       | 94.6      | 5.1                       | 7.6       | 6.9                                            | 9.4       | 22   |
| 15     | Boscalid           | FU                | carboxamide     | 11.5                  | 343.0              | 140.0 (20)                                   | 307.0 (20)                    | 0.003       | 101.1      | 95.6      | 1.8                       | 7.1       | 4.3                                            | 8.5       | 25   |
| 16     | Bupirimate         | FU                | pyrimidine      | 13.0                  | 317.0              | 108.0 (30)                                   | 166.0 (30)                    | 0.001       | 98.2       | 94.7      | 8.4                       | 5.4       | 8.4                                            | 6.8       | 31   |
| 17     | Buprofezin         | AC/IN             | thiadiazine     | 17.6                  | 306.0              | 57.0 (25)                                    | 201.0 (20)                    | 0.002       | 79.3       | 83.5      | 3.6                       | 7.2       | 6.0                                            | 6.8       | 37   |
| 18     | Cadusafos          | IN/NE             | organophosphate | 14.8                  | 271.0              | 131.0 (20)                                   | 159.0 (15)                    | 0.001       | 94.0       | 97.5      | 6.2                       | 1.7       | 2.8                                            | 10.4      | 21   |
| 19     | Carbaryl           | IN/PG             | carbamate       | 6.4                   | 202.1              | 145.1 (10)                                   | 127.1 (5)                     | 0.008       | 86.7       | 84.1      | 4.5                       | 8.4       | 4.1                                            | 3.7       | 16   |
| 20     | Carbendazim        | FU                | benzimidazole   | 2.9                   | 192.1              | 132.1 (35)                                   | 160.1 (35)                    | 0.002       | 96.3       | 89.3      | 9.3                       | 7.3       | 7.9                                            | 2.9       | 27   |

|    |                          |          |                 |      |       |            |            |       |       |      |     |     |      |      |    |
|----|--------------------------|----------|-----------------|------|-------|------------|------------|-------|-------|------|-----|-----|------|------|----|
| 21 | Carbofuran               | IN/NE/AC | carbamate       | 6.0  | 222.0 | 123.0 (35) | 165.0 (25) | 0.008 | 80.6  | 92.5 | 5.1 | 4.3 | 4.2  | 6.4  | 20 |
| 22 | Chloridazon              | HB       | pyridazinone    | 3.7  | 222.0 | 77.0 (25)  | 92.0 (30)  | 0.001 | 97.1  | 92.4 | 4.2 | 6.3 | 7.7  | 6.9  | 34 |
| 23 | Chlorpyrifos methyl      | IN       | organophosphate | 16.2 | 322.0 | 125.0 (15) | 290.0 (15) | 0.003 | 74.2  | 78.3 | 8.2 | 4.6 | 4.2  | 8.4  | 26 |
| 24 | Chlorpyrifos             | IN       | organophosphate | 17.8 | 350.0 | 198.1 (20) | 96.9 (30)  | 0.008 | 88.4  | 86.7 | 3.1 | 2.6 | 8.4  | 2.7  | 36 |
| 25 | Chlorsulfuron            | HB       | sulphonylurea   | 6.1  | 358.0 | 290.0 (20) | 141.0 (15) | 0.001 | 105.1 | 94.6 | 4.5 | 2.1 | 4.9  | 11.5 | 22 |
| 26 | Clethodim                | HB       | cyclohexenone   | 17.0 | 360.1 | 164.1 (20) | 268.0 (10) | 0.002 | 82.4  | 88.7 | 2.4 | 4.1 | 3.7  | 6.4  | 19 |
| 27 | Clodinafop               | HB       | phenoxypionic   | 8.5  | 350.0 | 91.1 (30)  | 266.0 (15) | 0.001 | 95.4  | 97.3 | 1.4 | 1.9 | 6.3  | 6.2  | 31 |
| 28 | Clofentezine             | AC       | tetrazine       | 15.5 | 303.0 | 102.0 (30) | 138.0 (20) | 0.001 | 96.4  | 92.5 | 4.6 | 2.8 | 8.1  | 8.4  | 37 |
| 29 | Cyanofenphos             | IN       | organophosphate | 15.8 | 304.0 | 157.0 (20) | 276.0 (10) | 0.006 | 91.4  | 94.6 | 4.5 | 7.7 | 1.9  | 1.3  | 25 |
| 30 | Cymoxanil                | FU       | acetamide       | 4.3  | 199.0 | 111.0 (15) | 128.0 (10) | 0.008 | 90.2  | 94.3 | 7.4 | 3.6 | 4.0  | 5.7  | 18 |
| 31 | Cyproconazole            | FU       | triazole        | 9.4  | 292.1 | 70.0 (15)  | 125.0 (15) | 0.002 | 96.4  | 91.3 | 4.5 | 1.6 | 6.2  | 4.3  | 31 |
| 32 | Cyprodinil               | FU       | pyrimidinamines | 12.2 | 226.0 | 93.0 (40)  | 108.0 (30) | 0.002 | 75.4  | 73.7 | 2.1 | 8.4 | 8.6  | 8.5  | 37 |
| 33 | Daminozide               | PG       | hydrazides      | 1.4  | 161.1 | 143.1 (15) | 102.2 (15) | 0.002 | 85.4  | 81.6 | 3.4 | 2.7 | 7.9  | 7.3  | 39 |
| 34 | Demeton-S-methyl         | IN/AC    | organophosphate | 5.4  | 231.0 | 61.1 (25)  | 82.1 (10)  | 0.003 | 94.6  | 98.3 | 4.7 | 2.6 | 4.6  | 5.9  | 26 |
| 35 | Demeton-S-methyl-sulfone | IN/AC    | organophosphate | 3.2  | 263.0 | 82.0 (10)  | 121.0 (15) | 0.001 | 91.2  | 86.4 | 5.4 | 3.7 | 6.9  | 5.3  | 24 |
| 36 | Desmedipham              | HB       | carbamate       | 9.5  | 301.0 | 136.0 (20) | 182.0 (10) | 0.001 | 96.4  | 92.8 | 3.1 | 6.7 | 4.7  | 8.4  | 26 |
| 37 | Diazinon                 | IN       | organophosphate | 15.2 | 305.0 | 169.1 (20) | 153.2 (20) | 0.002 | 79.4  | 81.5 | 5.4 | 9.7 | 5.2  | 6.8  | 28 |
| 38 | Dichlofluanid            | FU       | sulphamide      | 14.5 | 333.0 | 123.0 (20) | 224.0 (10) | 0.002 | 75.6  | 79.3 | 5.2 | 4.9 | 9.4  | 3.7  | 33 |
| 39 | Diethofencarb            | FU       | carbamate       | 9.7  | 268.0 | 124.0 (35) | 226.0 (10) | 0.002 | 95.6  | 94.3 | 4.6 | 2.7 | 11.9 | 5.3  | 31 |
| 40 | Difenoconazole           | FU       | triazole        | 14.7 | 406.0 | 111.9 (40) | 251.9 (25) | 0.001 | 103.0 | 98.0 | 5.8 | 3.7 | 8.3  | 8.3  | 27 |
| 41 | Diflubenzuron            | IN       | benzamide       | 12.4 | 4.6   | 111.2 (40) | 251.1 (20) | 0.002 | 103.5 | 95.1 | 2.1 | 4.3 | 9.4  | 5.9  | 26 |
| 42 | Dimethenamid             | HB       | amide           | 9.8  | 276.0 | 168.0 (25) | 244.0 (15) | 0.001 | 94.6  | 92.7 | 6.1 | 4.5 | 3.7  | 2.7  | 20 |
| 43 | Dimethoate               | IN/AC    | organophosphate | 3.9  | 230.0 | 125.0 (20) | 199.1 (10) | 0.002 | 92.4  | 93.1 | 5.5 | 2.7 | 5.8  | 10.5 | 18 |
| 44 | Dimethomorph             | FU       | morpholine      | 9.1  | 388.1 | 165.0 (30) | 300.9 (20) | 0.001 | 73.8  | 85.4 | 9.4 | 2.8 | 6.3  | 6.7  | 36 |
| 45 | Disulfoton sulfone       | IN       | organophosphate | 8.7  | 307.0 | 97.0 (30)  | 125.0 (10) | 0.002 | 95.6  | 91.2 | 1.1 | 4.5 | 8.9  | 4.2  | 21 |

|    |                  |       |                       |      |       |            |            |       |       |       |      |      |      |      |    |
|----|------------------|-------|-----------------------|------|-------|------------|------------|-------|-------|-------|------|------|------|------|----|
| 46 | Epoxiconazole    | FU    | triazole              | 11.4 | 330.0 | 101.0 (40) | 121.1 (20) | 0.001 | 95.4  | 97.3  | 4.8  | 3.7  | 6.3  | 7.3  | 27 |
| 47 | Ethiofencarb     | IN    | carbamate             | 6.7  | 226.0 | 107.0 (15) | 164.0 (10) | 0.001 | 95.1  | 106.2 | 6.3  | 4.1  | 9.2  | 8.5  | 34 |
| 48 | Ethirimol        | FU    | miazines              | 3.8  | 210.2 | 140.1 (30) | 98.1 (35)  | 0.003 | 95.4  | 93.6  | 5.2  | 6.7  | 6.8  | 2.9  | 21 |
| 49 | Etofenprox       | IN    | pyrethroid            | 17.5 | 394.3 | 107.0 (40) | 177.0 (15) | 0.010 | 92.1  | 89.3  | 5.5  | 2.7  | 7.5  | 4.6  | 32 |
| 50 | Etoxazole        | IN    | diphenyl<br>oxazoline | 18.3 | 361.0 | 141.0 (30) | 177.0 (20) | 0.001 | 93.4  | 91.7  | 3.5  | 1.7  | 6.5  | 18.8 | 29 |
| 51 | Fenamidone       | FU    | imidazole             | 11.0 | 312.0 | 92.0 (25)  | 236.1 (15) | 0.001 | 88.2  | 92.7  | 7.6  | 3.8  | 7.8  | 3.7  | 27 |
| 52 | Fenarimol        | FU    | pyrimidine            | 10.8 | 331.0 | 81.0 (30)  | 268.0 (20) | 0.001 | 93.5  | 94.6  | 7.3  | 9.1  | 4.8  | 4.8  | 37 |
| 53 | Fenazaquin       | AC    | quinazoline           | 18.6 | 307.2 | 57.1 (20)  | 161.2 (15) | 0.001 | 91.9  | 98.6  | 4.4  | 1    | 9.3  | 5.3  | 32 |
| 54 | Fenbuconazole    | FU    | triazole              | 12.6 | 337.1 | 70.0 (20)  | 125.1 (30) | 0.001 | 98.7  | 92.4  | 5.2  | 2.6  | 10.2 | 7.4  | 29 |
| 55 | Fenhexamid       | FU    | hydroxyanilide        | 11.3 | 302.0 | 55.1 (40)  | 97.1 (20)  | 0.001 | 101.6 | 98.2  | 4.6  | 6.2  | 9.4  | 8.5  | 33 |
| 56 | Fenoxaprop-ethyl | HB    | phenoxypropionic      | 16.8 | 362.0 | 121.0 (25) | 288.0 (20) | 0.001 | 94.1  | 89.6  | 5.2  | 1.3  | 2.9  | 9.3  | 18 |
| 57 | Fenoxycarb       | IN    | carbamate             | 13.1 | 302.0 | 88.0 (20)  | 116.0 (10) | 0.001 | 84.6  | 92.1  | 5.3  | 4.1  | 9.5  | 4.7  | 26 |
| 58 | Fenpropathrin    | IN/AC | pyrethroid            | 18.4 | 350.0 | 97.0 (30)  | 125.0 (15) | 0.008 | 102.5 | 95.4  | 4.5  | 2.8  | 4.0  | 6.4  | 19 |
| 59 | Fenpyroximate    | AC    | pyrazole              | 18.3 | 422.2 | 138.1 (30) | 366.1 (25) | 0.001 | 96.4  | 86.2  | 8.4  | 6.6  | 6.4  | 13.5 | 24 |
| 60 | Fludioxonil      | FU    | phenylpyrrole         | 10.7 | 247.0 | 180.0 (30) | 126.0 (30) | 0.001 | 91.3  | 95.2  | 2    | 2.4  | 7.3  | 2.9  | 32 |
| 61 | Flufenoxuron     | IN    | benzoylurea           | 17.9 | 489.0 | 158.1 (10) | 141.1 (15) | 0.002 | 74.5  | 76.4  | 4.8  | 5.4  | 6.9  | 8.6  | 31 |
| 62 | Flusilazole      | FU    | triazole              | 12.5 | 316.0 | 165.0 (40) | 247.0 (25) | 0.002 | 100.3 | 95.3  | 8.4  | 2.6  | 3.2  | 5.7  | 19 |
| 63 | Flutriafol       | FU    | triazole              | 6.5  | 302.1 | 70.0 (15)  | 123.0 (20) | 0.002 | 90.4  | 94.1  | 2.7  | 5.1  | 7.9  | 4.7  | 36 |
| 64 | Fonofos          | IN    | organophosphate       | 15.4 | 247.1 | 109.0 (20) | 137.0 (10) | 0.002 | 86.4  | 87.2  | 3.6  | 1.8  | 5.3  | 6.3  | 27 |
| 65 | Furalaxyl        | FU    | amide                 | 9.5  | 302.2 | 242.2 (15) | 270.2 (5)  | 0.003 | 92.5  | 94.6  | 7.5  | 1.3  | 6.3  | 8.5  | 22 |
| 66 | Haloxypop        | HB    | phenoxypropionic      | 12.1 | 434.0 | 91.0 (35)  | 316.0 (20) | 0.002 | 95.3  | 91.7  | 5.2  | 3.4  | 8.4  | 5.9  | 31 |
| 67 | Haloxypop-methyl | HB    | phenoxypropionic      | 16.4 | 376.0 | 316.0 (15) | 288.0 (20) | 0.001 | 77.6  | 74.3  | 8.5  | 11.6 | 7.3  | 3.8  | 22 |
| 68 | Hexaconazole     | FU    | triazole              | 12.4 | 314.0 | 70.0 (30)  | 159.0 (30) | 0.001 | 97.6  | 95.4  | 5.4  | 1.8  | 9.2  | 6.3  | 24 |
| 69 | Hexaflumuron     | IN    | benzoylurea           | 16.3 | 459.0 | 276.0 (20) | 439.0 (10) | 0.003 | 100.4 | 95.7  | 11.5 | 6.7  | 12.1 | 8.6  | 37 |
| 70 | Hexythiazox      | IN/AC | carboxamide           | 17.9 | 353.0 | 168.1 (25) | 228.0 (15) | 0.003 | 95.4  | 93.7  | 6.4  | 1.1  | 5.3  | 5.9  | 35 |

|    |                 |       |                 |      |       |            |            |       |       |       |      |      |      |      |    |
|----|-----------------|-------|-----------------|------|-------|------------|------------|-------|-------|-------|------|------|------|------|----|
| 71 | Imazalil        | FU    | imidazole       | 6.2  | 297.0 | 69.0 (30)  | 159.0 (35) | 0.001 | 87.5  | 94.5  | 5.4  | 8.2  | 7.7  | 7.3  | 32 |
| 72 | Imidacloprid    | IN    | neonicotionid   | 3.8  | 256.0 | 175.0 (30) | 209.0 (25) | 0.008 | 93.0  | 79.3  | 6.3  | 4.9  | 4.1  | 7.9  | 28 |
| 73 | Iprovalicarb    | FU    | carbamate       | 10.7 | 321.1 | 119.0 (20) | 203.2 (5)  | 0.002 | 95.4  | 89.6  | 7.5  | 11.3 | 7.9  | 4.8  | 26 |
| 74 | Isoprocarb      | IN    | carbamate       | 7.2  | 194.1 | 95.0 (20)  | 137.1 (5)  | 0.001 | 86.4  | 81.2  | 8.4  | 6.4  | 9.4  | 7.3  | 36 |
| 75 | Malaaxon        | IN/AC | organophosphate | 5.9  | 315.1 | 99.0 (25)  | 127.0 (10) | 0.001 | 98.4  | 101.4 | 3.7  | 5.6  | 4.3  | 8.4  | 21 |
| 76 | Malathion       | IN/AC | organophosphate | 12.7 | 331.0 | 99.0 (25)  | 127.0 (10) | 0.001 | 97.3  | 94.8  | 8.4  | 6.2  | 8.4  | 6.6  | 29 |
| 77 | Metalaxyl-M     | FU    | phenylamide     | 6.9  | 280.1 | 192.1 (15) | 220.0 (10) | 0.001 | 96.4  | 93.7  | 8.5  | 15.4 | 9.3  | 4.6  | 22 |
| 78 | Metalaxyl       | FU    | phenylamide     | 6.8  | 280.1 | 192.1 (20) | 220.1 (15) | 0.002 | 99.2  | 100.7 | 8.4  | 6.3  | 6.7  | 5.3  | 26 |
| 79 | Methamidophos   | IN    | organophosphate | 1.7  | 142.0 | 94.0 (10)  | 125.0 (15) | 0.002 | 104.3 | 98.2  | 11.4 | 3.8  | 7.3  | 8.4  | 32 |
| 80 | Methiocarb      | IN    | carbamate       | 8.9  | 226.0 | 169.0 (20) | 164.0 (10) | 0.008 | 97.6  | 94.3  | 7.6  | 2.8  | 5.9  | 6.9  | 27 |
| 81 | Methomyl        | IN    | carbamate       | 3.0  | 163.0 | 88.0 (10)  | 106.0 (10) | 0.003 | 95.3  | 89.6  | 7.6  | 5.9  | 6.3  | 6.3  | 26 |
| 82 | Methoxyfenozide | IN    | hydrazides      | 12.6 | 369.1 | 149.1 (20) | 313.2 (10) | 0.003 | 68.3  | 71.5  | 12.6 | 8.4  | 5.2  | 5.8  | 22 |
| 83 | Mevinphos       | IN/AC | organophosphate | 4.2  | 225.0 | 127.0 (15) | 193.0 (5)  | 0.002 | 86.4  | 80.9  | 8.1  | 12.4 | 8.3  | 7.4  | 33 |
| 84 | Myclobutanil    | FU    | triazole        | 10.8 | 289.1 | 70.2 (20)  | 125.1 (30) | 0.001 | 79.4  | 97.4  | 5.9  | 8.2  | 5.0  | 6.7  | 27 |
| 85 | Nicosulfuron    | HB    | sulphonylurea   | 4.8  | 411.0 | 106.0 (30) | 182.0 (20) | 0.002 | 83.5  | 84.7  | 8.8  | 2.6  | 6.8  | 11.9 | 21 |
| 86 | Nitenpyram      | IN    | neonicotinoid   | 2.9  | 271.1 | 224.1 (15) | 237.1 (10) | 0.003 | 88.5  | 94.1  | 2.1  | 4.6  | 8.3  | 6.4  | 25 |
| 87 | Omethoate       | IN/AC | organophosphate | 2.2  | 214.1 | 125.1 (20) | 183.1 (10) | 0.003 | 100.5 | 89.4  | 7.5  | 4.6  | 5.1  | 6.2  | 27 |
| 88 | Oxadixyl        | FU    | phenylamide     | 5.1  | 279.0 | 132.0 (35) | 219.0 (10) | 0.001 | 86.4  | 82.3  | 9.4  | 3.7  | 7.3  | 8.3  | 26 |
| 89 | Paclobutrazol   | FU/PG | triazole        | 8.9  | 294.0 | 70.0 (40)  | 125.0 (45) | 0.002 | 98.8  | 85.7  | 6.8  | 9.2  | 8.4  | 3.9  | 33 |
| 90 | Paraaxon-ethyl  | IN    | organophosphate | 7.2  | 276.2 | 174.1 (20) | 220.0 (15) | 0.001 | 98.3  | 92.7  | 3.5  | 1.7  | 5.8  | 5.3  | 32 |
| 91 | Penconazole     | FU    | triazole        | 12.7 | 284.0 | 70.1 (15)  | 159.1 (30) | 0.001 | 98.3  | 91.7  | 5.6  | 1.7  | 6.2  | 7.5  | 37 |
| 92 | Pendimethalin   | HB    | dinitroaniline  | 17.9 | 282.2 | 194.1 (15) | 212.1 (5)  | 0.001 | 89.4  | 97.3  | 6.1  | 6.4  | 9.4  | 8.5  | 25 |
| 93 | Phenmedipham    | HB    | carbamate       | 9.4  | 301.0 | 136.0 (20) | 168.1 (10) | 0.001 | 84.3  | 88.9  | 9.4  | 5.2  | 10.4 | 3.9  | 31 |
| 94 | Phenthoate      | IN    | organophosphate | 15.1 | 321.0 | 135.0 (20) | 163.2 (10) | 0.008 | 95.0  | 97.3  | 7.6  | 4.8  | 7.4  | 11.7 | 27 |
| 95 | Phorate         | IN    | organophosphate | 15.8 | 261.5 | 75.0 (10)  | 199.0 (5)  | 0.050 | 84.3  | 76.8  | 9.9  | 12.4 | 3.9  | 7.3  | 24 |
| 96 | Phosalone       | IN/AC | organophosphate | 16.2 | 368.0 | 111.0 (35) | 182.0 (15) | 0.008 | 108.7 | 92.3  | 8.9  | 4.3  | 8.2  | 9.5  | 35 |

|     |                 |       |                  |      |       |            |            |       |       |      |      |      |      |      |    |
|-----|-----------------|-------|------------------|------|-------|------------|------------|-------|-------|------|------|------|------|------|----|
| 97  | Phosmet         | IN    | organophosphate  | 10.4 | 318.0 | 77.0 (35)  | 160.0 (20) | 0.001 | 100.1 | 94.6 | 5.4  | 3.8  | 6.2  | 4.7  | 27 |
| 98  | Phosphamidon    | IN/AC | organophosphate  | 4.8  | 300.1 | 174.1 (10) | 127.0 (20) | 0.002 | 96.5  | 99.1 | 4.5  | 7.8  | 8.5  | 6.4  | 32 |
| 99  | Picolinafen     | HB    | amide            | 17.2 | 377.0 | 238.0 (20) | 359.0 (20) | 0.002 | 86.5  | 88.4 | 1.5  | 7.1  | 6.9  | 8.4  | 37 |
| 100 | Picoxystrobin   | FU    | methoxyacrylates | 14.8 | 368.1 | 145.0 (20) | 205.0 (5)  | 0.010 | 86.4  | 83.6 | 8.4  | 5.7  | 8.8  | 9.1  | 27 |
| 101 | Pirimicarb      | IN    | carbamate        | 4.7  | 239.2 | 72.0 (20)  | 182.2 (10) | 0.001 | 90.4  | 97.2 | 8.2  | 4.7  | 3.7  | 7.8  | 20 |
| 102 | Pretilachlor    | HB    | amide            | 16.3 | 312.1 | 252.1 (15) | 176.2 (25) | 0.001 | 81.4  | 84.2 | 5.4  | 7.8  | 12.6 | 5.7  | 27 |
| 103 | Prochloraz      | FU    | imidazole        | 13.6 | 376.2 | 70.1 (35)  | 307.9 (10) | 0.002 | 94.7  | 90.2 | 4.2  | 5.1  | 7.4  | 3.5  | 21 |
| 104 | Promecarb       | IN    | carbamate        | 9.9  | 208.0 | 109.0 (10) | 151.0 (10) | 0.001 | 97.3  | 99.2 | 8.1  | 6.4  | 8.4  | 6.3  | 28 |
| 105 | Prometryn       | HB    | triazine         | 9.3  | 242.2 | 158.1 (20) | 200.2 (15) | 0.001 | 85.1  | 88.3 | 7.4  | 6.7  | 7.3  | 6.5  | 33 |
| 106 | Propamocarb     | FU    | carbamate        | 2.3  | 189.1 | 74.0 (40)  | 102.0 (35) | 0.001 | 94.2  | 90.1 | 11.6 | 8.2  | 8.5  | 8.5  | 38 |
| 107 | Propargite      | AC    | sulphite ester   | 18.4 | 368.1 | 231.0 (5)  | 175.1 (15) | 0.010 | 84.6  | 97.1 | 8.4  | 7.6  | 4.8  | 4.9  | 21 |
| 108 | Propazine       | HB    | triazine         | 8.2  | 229.9 | 146.1 (20) | 188.1 (15) | 0.001 | 99.3  | 91.4 | 8.6  | 1.6  | 5.3  | 8.4  | 28 |
| 109 | Propiconazole   | FU    | triazole         | 13.5 | 342.1 | 159.1 (20) | 69.0 (20)  | 0.001 | 94.5  | 97.1 | 8.8  | 4.1  | 8.5  | 7.9  | 25 |
| 110 | Propyzamide     | HB    | benzamide        | 11.2 | 256.0 | 173.0 (20) | 190.0 (15) | 0.001 | 95.3  | 97.6 | 1.8  | 2.4  | 7.2  | 7.2  | 37 |
| 111 | Pymetrozine     | IN    | pyridine         | 2.2  | 218.0 | 79.0 (25)  | 105.0 (15) | 0.001 | 85.6  | 84.9 | 5.2  | 3.7  | 8.9  | 8.5  | 22 |
| 112 | Pyraclostrobin  | FU    | methoxyacrylates | 15.6 | 388.1 | 163.0 (30) | 193.9 (20) | 0.002 | 90.3  | 84.6 | 5.2  | 4.7  | 5.7  | 9.8  | 17 |
| 113 | Pyridaphenthion | IN    | organophosphate  | 11.8 | 341.0 | 92.0 (30)  | 189.0 (20) | 0.001 | 96.4  | 92.7 | 6.6  | 1.7  | 6.3  | 10.5 | 25 |
| 114 | Pyrimethanil    | FU    | pyrimidine       | 7.9  | 200.0 | 107.0 (45) | 168.0 (35) | 0.001 | 93.4  | 90.1 | 8.2  | 9.9  | 8.4  | 7.3  | 37 |
| 115 | Pyriproxyfen    | IN    | unclassified     | 17.6 | 322.0 | 96.0 (15)  | 227.0 (15) | 0.001 | 94.6  | 91.3 | 7.8  | 6.1  | 3.6  | 8.3  | 18 |
| 116 | Secbumeton      | HB    | triazine         | 5.6  | 226.2 | 170.1 (20) | 142.1 (20) | 0.001 | 95.1  | 98.4 | 5.1  | 6.6  | 6.3  | 3.8  | 27 |
| 117 | Sethoxydim      | HB    | cyclohexadione   | 17.3 | 328.0 | 178.0 (20) | 282.0 (10) | 0.002 | 94.6  | 93.4 | 10.8 | 5.7  | 8.7  | 5.3  | 36 |
| 118 | Simazine        | HB    | triazine         | 5.1  | 202.0 | 96.1 (20)  | 124.0 (15) | 0.001 | 105.4 | 95.7 | 6.9  | 2.7  | 4.9  | 7.5  | 31 |
| 119 | Spirotetramat   | IN    | tetronic acid    | 10.5 | 374.0 | 302.0 (25) | 330.0 (25) | 0.003 | 100.4 | 95.3 | 2.5  | 7.4  | 10.5 | 8.5  | 28 |
| 120 | Spiroxamine     | FU    | unclassified     | 8.8  | 298.0 | 142.0 (30) | 100.0 (30) | 0.001 | 100.4 | 95.7 | 2.4  | 3.7  | 11.2 | 5.4  | 34 |
| 121 | Tebuconazole    | FU    | triazole         | 11.9 | 308.0 | 70.1 (40)  | 125.0 (20) | 0.001 | 88.5  | 89.4 | 8.4  | 11.7 | 6.2  | 8.6  | 26 |
| 122 | Tepraloxydim    | HB    | cyclohexadione   | 11.5 | 342.0 | 166.0 (20) | 250.0 (10) | 0.002 | 81.7  | 86.7 | 4.6  | 5.1  | 8.4  | 13.5 | 37 |

|     |                    |       |                 |      |       |            |            |       |      |       |      |      |     |     |    |
|-----|--------------------|-------|-----------------|------|-------|------------|------------|-------|------|-------|------|------|-----|-----|----|
| 123 | Terbufos           | IN    | organophosphate | 17.6 | 289.0 | 57.1 (20)  | 103.0 (10) | 0.020 | 84.6 | 86.9  | 6.7  | 4.2  | 5.9 | 5.7 | 32 |
| 124 | Terbuthylazine     | HB    | triazine        | 8.9  | 230.0 | 96.0 (30)  | 174.0 (15) | 0.001 | 95.7 | 91.6  | 4.6  | 2.7  | 7.3 | 5.9 | 24 |
| 125 | Tetramethrin       | IN    | pyrethroid      | 17.4 | 332.2 | 164.1 (15) | 135.1 (15) | 0.001 | 87.3 | 84.9  | 5.4  | 7.6  | 5.9 | 6.3 | 18 |
| 126 | Thiabendazole      | FU    | benzimidazole   | 3.0  | 202.0 | 131.0 (30) | 175.0 (25) | 0.001 | 84.3 | 89.7  | 6.8  | 4.9  | 9.4 | 8.8 | 32 |
| 127 | Thiacloprid        | IN    | neonicotinoid   | 4.6  | 253.0 | 90.1 (35)  | 126.0 (20) | 0.001 | 97.6 | 88.4  | 7.2  | 2.2  | 6.2 | 6.4 | 21 |
| 128 | Thiamethoxam       | IN    | neonicotinoid   | 3.2  | 292.0 | 132.0 (20) | 211.2 (10) | 0.001 | 85.2 | 81.7  | 3.6  | 1.8  | 8.6 | 7.3 | 32 |
| 129 | Thiobencarb        | HB    | thiocarbamate   | 15.3 | 258.2 | 89.0 (40)  | 125.0 (20) | 0.001 | 92.4 | 90.7  | 11.7 | 6.4  | 7.4 | 1.6 | 20 |
| 130 | Thiodicarb         | IN    | carbamate       | 5.9  | 355.0 | 88.0 (15)  | 108.0 (15) | 0.008 | 91.4 | 101.7 | 4.9  | 3.7  | 7.2 | 9.5 | 26 |
| 131 | Thiophanate methyl | FU    | benzimidazole   | 5.6  | 343.1 | 151.1 (20) | 311.1 (10) | 0.003 | 72.7 | 79.4  | 5.8  | 9.3  | 8.4 | 4.9 | 38 |
| 132 | Tolclofos methyl   | IN    | organophosphate | 15.8 | 301.2 | 269.0 (15) | 125.2 (20) | 0.010 | 74.3 | 76.4  | 8.5  | 4.6  | 8.1 | 3.5 | 36 |
| 133 | Triadimefon        | FU    | triazole        | 11.3 | 294.1 | 69.3 (20)  | 197.2 (15) | 0.003 | 85.2 | 86.1  | 2.8  | 4.1  | 5.9 | 5.4 | 23 |
| 134 | Triadimenol        | FU    | triazole        | 8.7  | 296.0 | 69.9 (30)  | 126.9 (35) | 0.003 | 81.4 | 83.8  | 5.1  | 2.9  | 7.3 | 6.9 | 16 |
| 135 | Triazophos         | IN    | organophosphate | 12.9 | 314.1 | 162.1 (20) | 286.0 (10) | 0.002 | 84.6 | 89.1  | 8.5  | 4.3  | 9.2 | 6.3 | 17 |
| 136 | Trichlorfon        | IN    | organophosphate | 3.4  | 257.0 | 79.0 (30)  | 109.0 (20) | 0.001 | 96.4 | 92.7  | 6.4  | 2.8  | 4.1 | 6.8 | 22 |
| 137 | Trifloxystrobin    | FU    | strobilurin     | 16.8 | 409.0 | 145.0 (55) | 186.0 (35) | 0.002 | 75.5 | 85.7  | 6.4  | 2.5  | 5.3 | 8.4 | 18 |
| 138 | Triflumizole       | FU    | imidazole       | 15.2 | 346.0 | 73.0 (10)  | 278.0 (10) | 0.002 | 98.3 | 94.7  | 4.4  | 6.2  | 7.2 | 6.5 | 29 |
| 139 | Trifluralin        | HB    | dinitroaniline  | 12.2 | 336.0 | 138.9 (20) | 103.0 (40) | 0.060 | 89.4 | 88.1  | 7.7  | 12.4 | 6.9 | 9.6 | 34 |
| 140 | Triallate          | HB    | carbamate       | 18.2 | 304.0 | 86.0 (20)  | 143.0 (30) | 0.010 | 91.7 | 86.5  | 8.6  | 4.7  | 8.4 | 5.7 | 27 |
| 141 | Triticonazole      | FU    | triazole        | 9.5  | 318.0 | 70.0 (15)  | 125.0 (30) | 0.001 | 94.4 | 98.2  | 3.5  | 4.9  | 8.1 | 8.0 | 31 |
| 142 | Uniconazole        | FU/PG | triazole        | 10.7 | 292.1 | 70.1 (30)  | 125.1 (30) | 0.003 | 88.7 | 92.4  | 1.4  | 0.8  | 5.8 | 4.7 | 22 |

<sup>a</sup>AC: acaricide; FU: fungicide; HB: herbicide; IN: insecticide; NE: nematocide; PG: plant growth regulator; <sup>b</sup>CE: collision energy.
