# Supplementary material
Source: publisher figshare collection journal article supplement (https://tandf.figshare.com/articles/dataset/_/18972752)

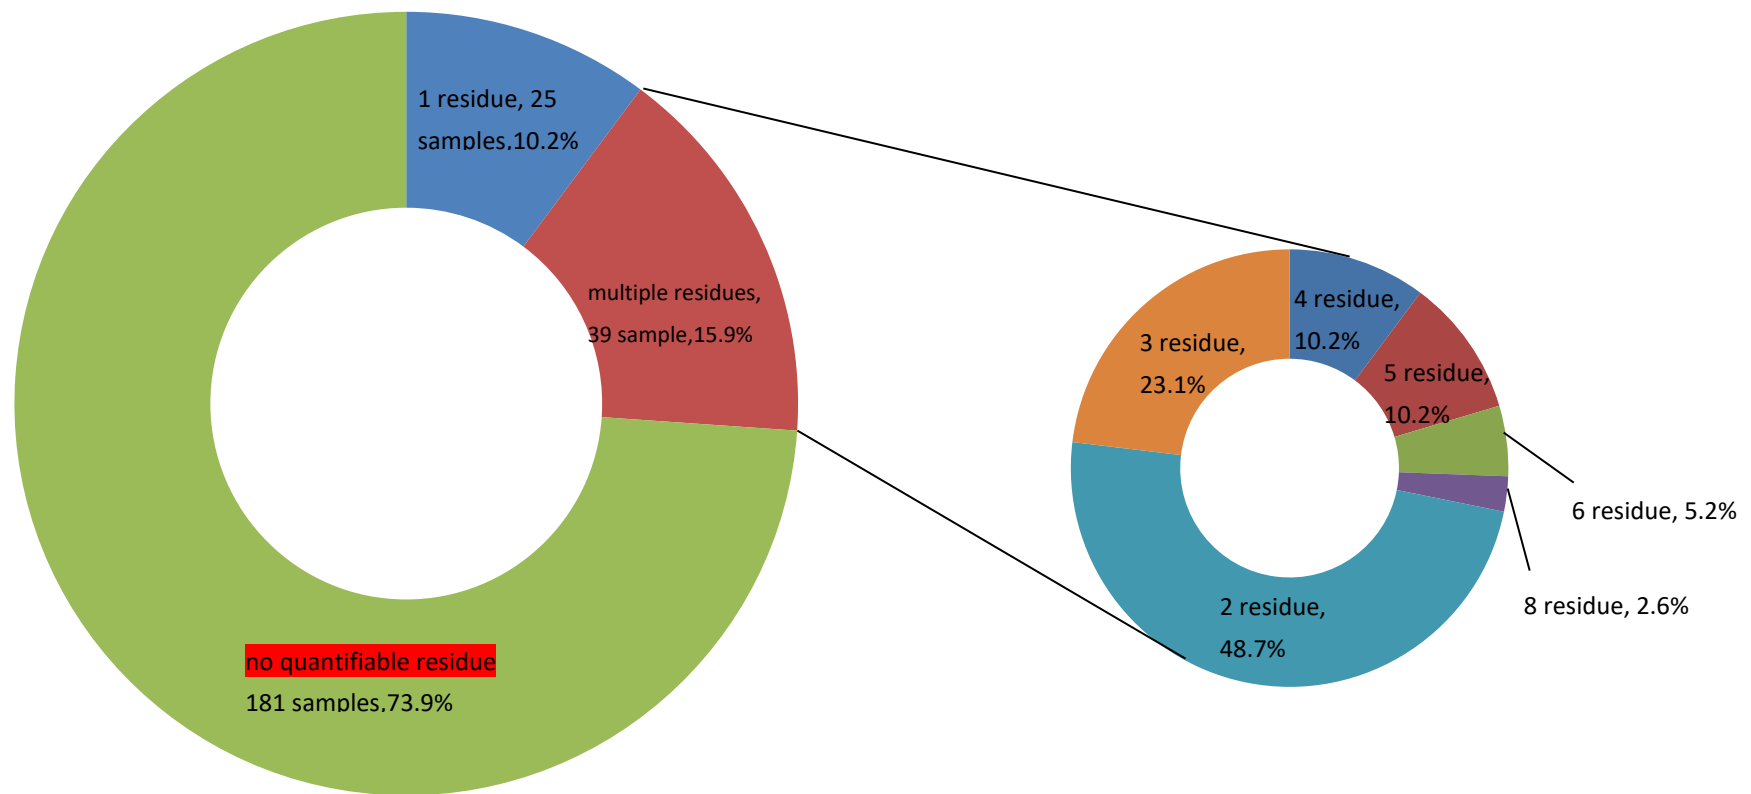

Fig.S1 The proportion of samples tested for different pesticide quantities.

Supplement: Supplementary file 2 [file 1]
